# Supplementary material
Source: publisher figshare collection journal article supplement (https://frontiersin.figshare.com/ndownloader/files/17873087)
Supplement: Supplementary file [file 17873087]

## Supplementary Material

### 1 Supplementary Figures

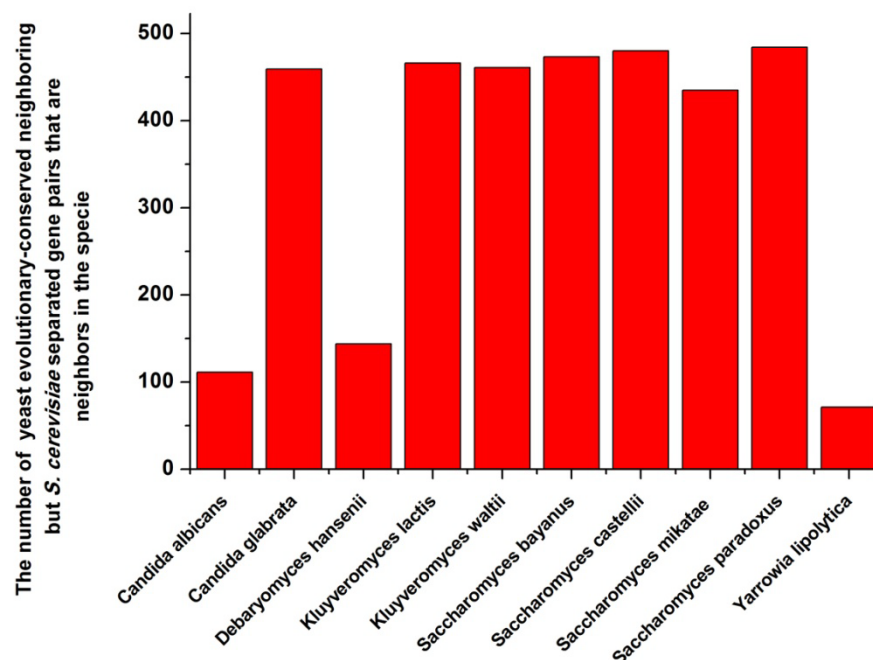

**Supplementary Figure 1.** For each species, the number of yeast evolutionary-conserved neighboring but *S. cerevisiae* separated gene pairs that are neighbors in this species was indicated.

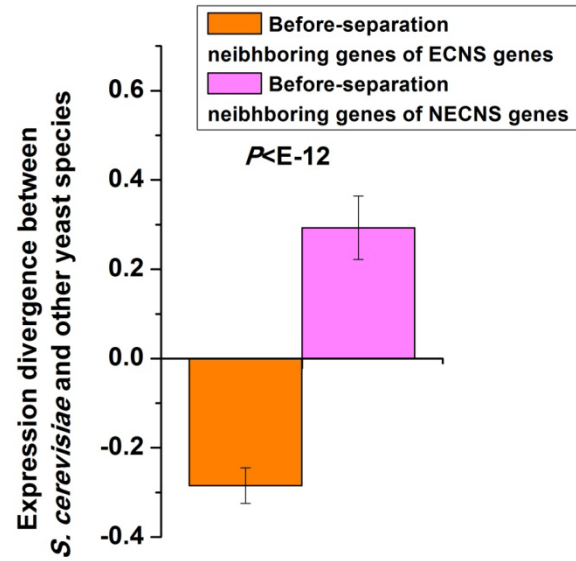

**Supplementary Figure 2.** Before-separation neighboring genes of ECNS genes also show lower expression divergence than those of NECNS genes. Median values that correspond to expression divergence between *S. cerevisiae* and other yeast species were shown for before-separation neighboring genes of ECNS genes and NECNS genes. Error bars were calculated by bootstrapping. The statistical significant value calculated from Mann-Whitney U-test was indicated.
